CORRECTION

# Correction: Galactomannan Testing and the Incidence of Invasive Pulmonary Aspergillosis: A 10-Year Nationwide Population-Based Study in Taiwan

Kuo-Shao Sun, Ching-Fang Tsai, Solomon Chih-Cheng Chen, Yih-Yuan Chen, Wan-Chun Huang

There is an error within [Table 3](#). The country in Row 4 is incorrectly labeled as ‘Australia’. The correct country should be: Austria. Please see the corrected [Table 3](#) here.

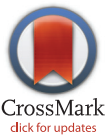

## OPEN ACCESS

**Citation:** Sun K-S, Tsai C-F, Chen SC-C, Chen Y-Y, Huang W-C (2016) Correction: Galactomannan Testing and the Incidence of Invasive Pulmonary Aspergillosis: A 10-Year Nationwide Population-Based Study in Taiwan. PLoS ONE 11(6): e0156566. doi:10.1371/journal.pone.0156566

**Published:** June 1, 2016

**Copyright:** © 2016 Sun et al. This is an open access article distributed under the terms of the [Creative Commons Attribution License](#), which permits unrestricted use, distribution, and reproduction in any medium, provided the original author and source are credited.

**Table 3. Comparison of large epidemiological studies on invasive aspergillosis.**

| Author            | Country       | Study period | Patient source                          | Incidence                          | Gender (M) |
|-------------------|---------------|--------------|-----------------------------------------|------------------------------------|------------|
| Kim et al.        | United States | 2000 ~ 2006  | Insurance company data-bank             | -                                  | 55.9%      |
| Steinbacht et al. | United States | 2004 ~ 2008  | 25 medical centers                      | -                                  | 58.9%      |
| Lortholary et al. | France        | 2005 ~ 2007  | 12 teaching hospitals                   | 271/1000,000per admission          | 62%        |
| Perkhofer et al.  | Austria       | 2007 ~ 2008  | 12 major transplant or oncology centers | 23,6/1000,000 hospital inhabitants | 58%        |
| Hsiue et al.      | Taiwan        | 2000 ~ 2009  | Single medical center                   | -                                  | 58%        |

doi:10.1371/journal.pone.0156566.t001

## Reference

1. Sun K-S, Tsai C-F, Chen SC-C, Chen Y-Y, Huang W-C (2016) Galactomannan Testing and the Incidence of Invasive Pulmonary Aspergillosis: A 10-Year Nationwide Population-Based Study in Taiwan. PLoS ONE 11(2): e0149964. doi:[10.1371/journal.pone.0149964](https://doi.org/10.1371/journal.pone.0149964) PMID: [26900697](https://pubmed.ncbi.nlm.nih.gov/26900697/)
